# Supplementary material for: Regulation of intercellular TARGET OF MONOPTEROS 7 protein transport in the Arabidopsis root
Source: Oxford University Press journal article supplement (doi:10.1242/dev.152892), 2017-12-22
Supplement: dev152892supp.pdf [file dev152892supp.pdf]

Fig S1. Lu et al.

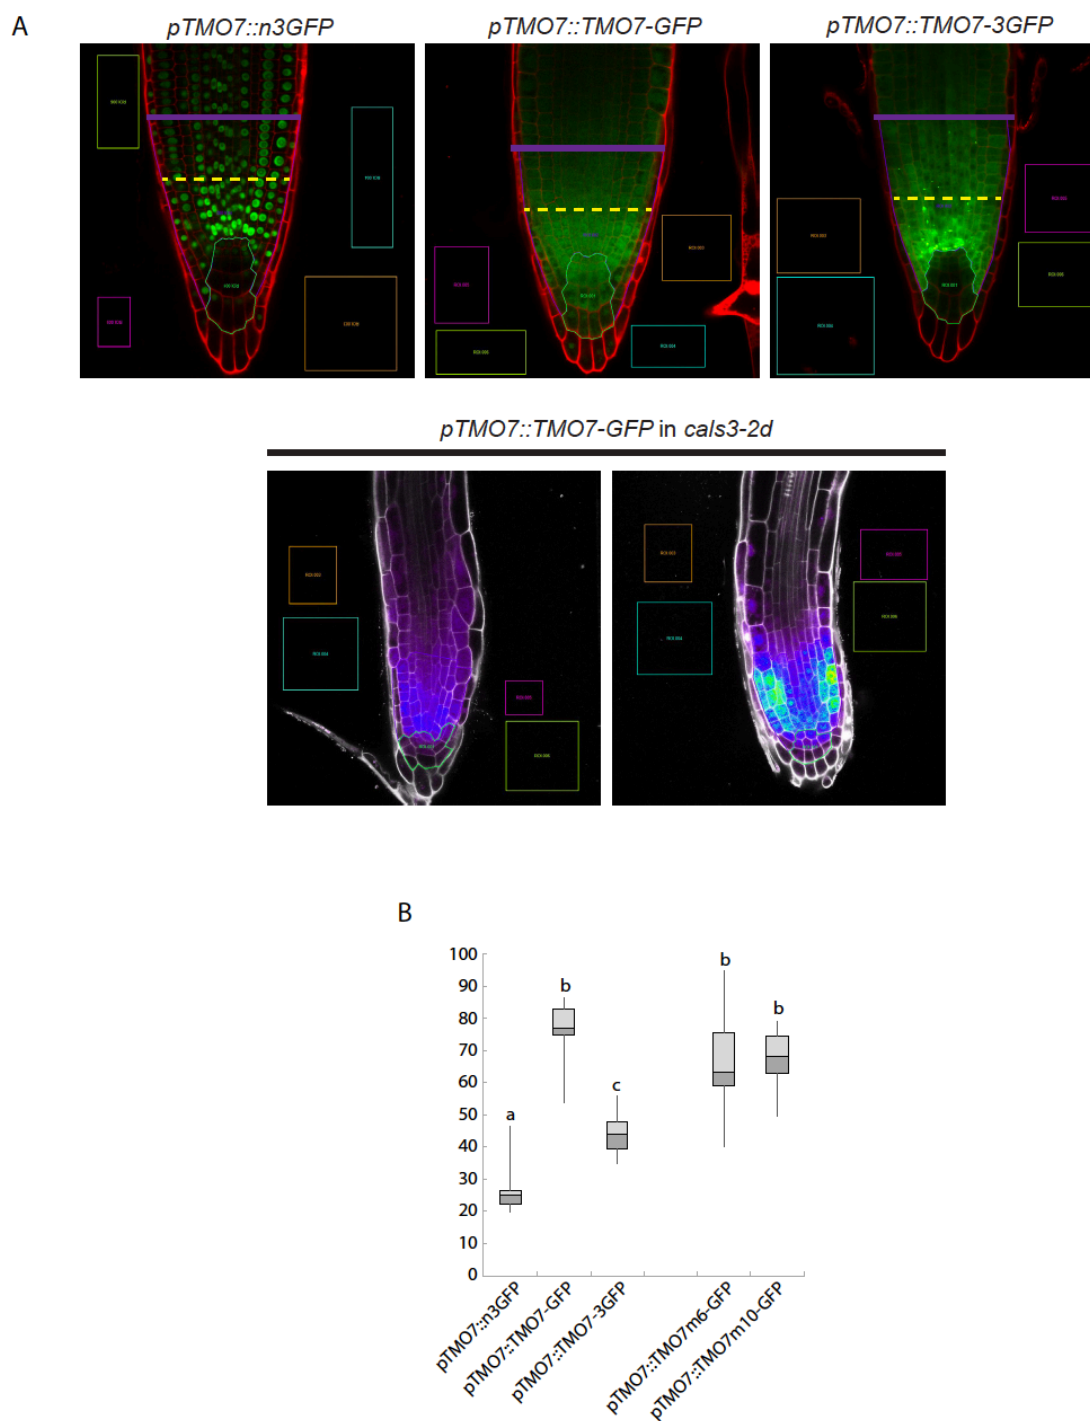

**Fig S1. Sampling of Regions Of Interest (ROI) for statistical analysis.** (A) Examples of confocal images analysed by the Leica Application Suite (LAS) program. The ROI1 (green region) was selected including the QC, and four layers of root cap cells. Regions outside the ROI1 up to the 12<sup>th</sup> cortex cell (indicated by the purple lines), besides the outer most root cap cells, were selected as the ROI2. Four other ROIs (ROI3-6) were selected to check the

background intensity. For selection in *cals3-2d*, the ROI1 and ROI2 were selected based on the morphology, the ROI1 includes 3 layers of cells from most distal region of the tip (excluding the most outer root cap cell), while ROI2 was selected based on the hypothetical cortex cells. (B) Intensity ratio of selected transgenic lines from Fig. 3 with narrower ROI2 region (indicated by the yellow dash lines). The results indicate that both TMO7<sub>m6</sub>- and TMO7<sub>m10</sub>-GFP have similar protein mobility to the TMO7-GFP.

Fig S2. Lu et al.

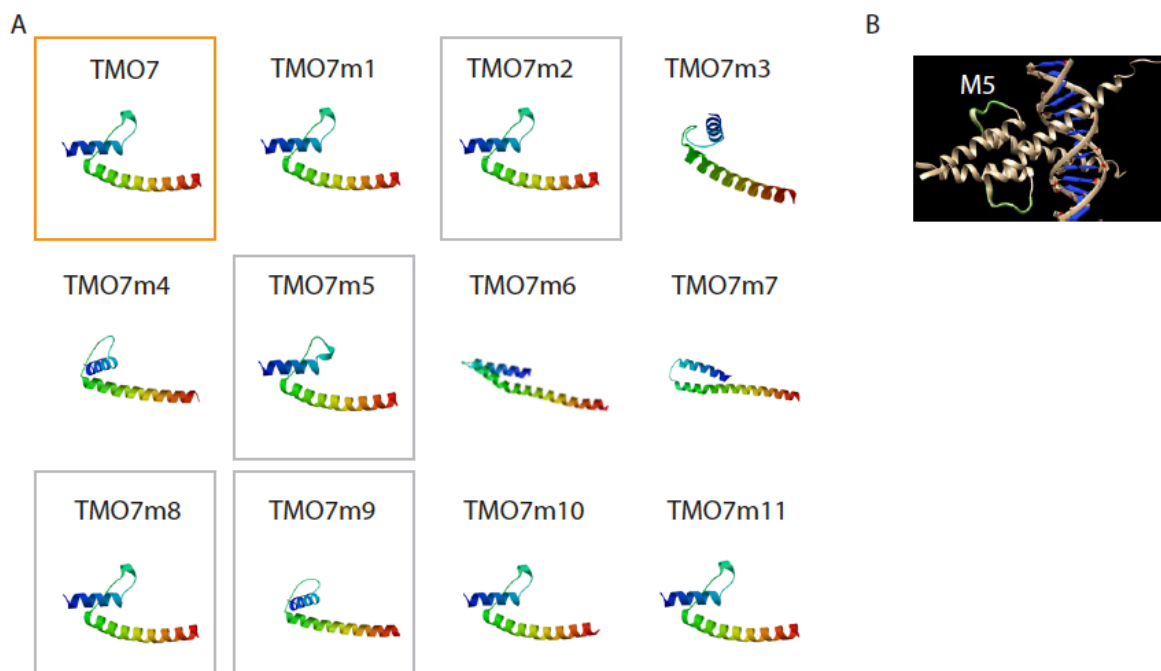

**Fig S2. Structural homology models of TMO7 linker-scanning mutants.** (A) The predicted structures of TMO7 and TMO7 mutants. The orange rectangle indicates the predicted TMO7 structure; Grey rectangles indicates the mutants affecting mobility. Note that only m9 has a minor predicted effect on structure while the remaining mobility mutants have the same predicted structure as TMO7. (B) The overlay of TMO7-M5 region on protein model of MyoD bHLH domain by chimera program (<https://www.cgl.ucsf.edu/chimera/>) with the PDB ID: 1MDY.

Fig S3 Lu et al.

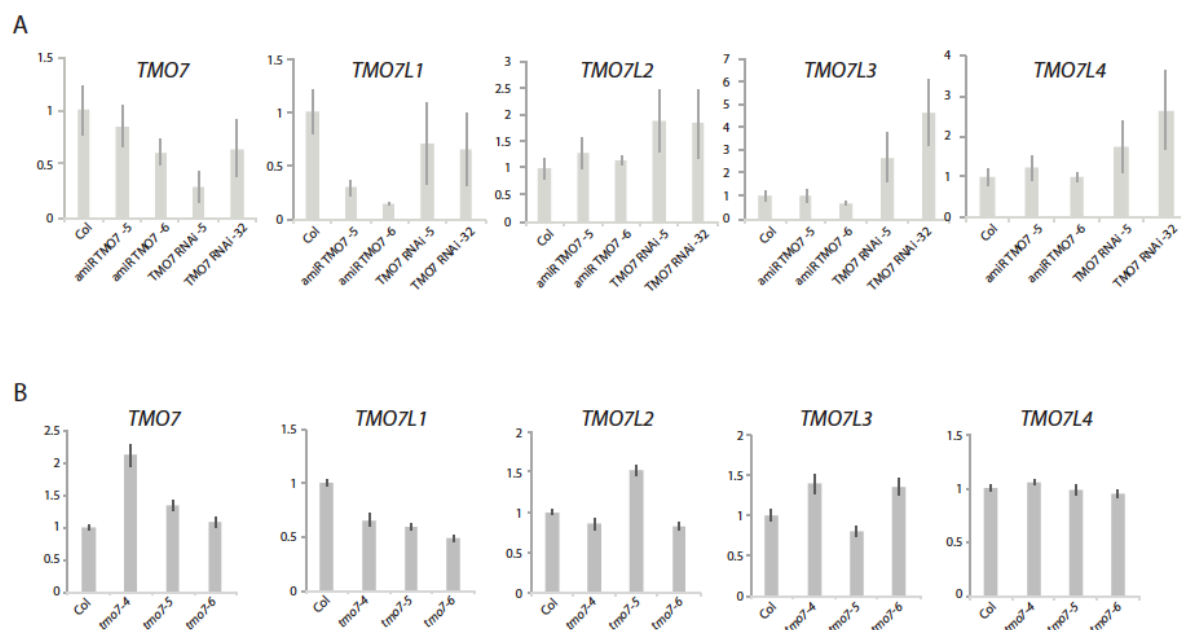

**Fig. S3. Quantification of TMO7-Like genes in gene silencing lines and CRISPR/Cas9 generated *tmo7* mutants.**

Expression level of *TMO7* family genes in (A) RNA suppression lines and (B) CRISPR/Cas9 *tmo7* lines by qRT-PCR analysis, relative expression level compared with endogenous control, *ACTIN2*. Note that in gene silencing lines, the *TMO7* family genes are highly interfered, while in CRISPR/Cas9 *tmo7* mutants, the gene expression is relatively stable. Quantified with three biological repeats and error bar indicates standard error of the mean.

Fig S4. Lu et al.

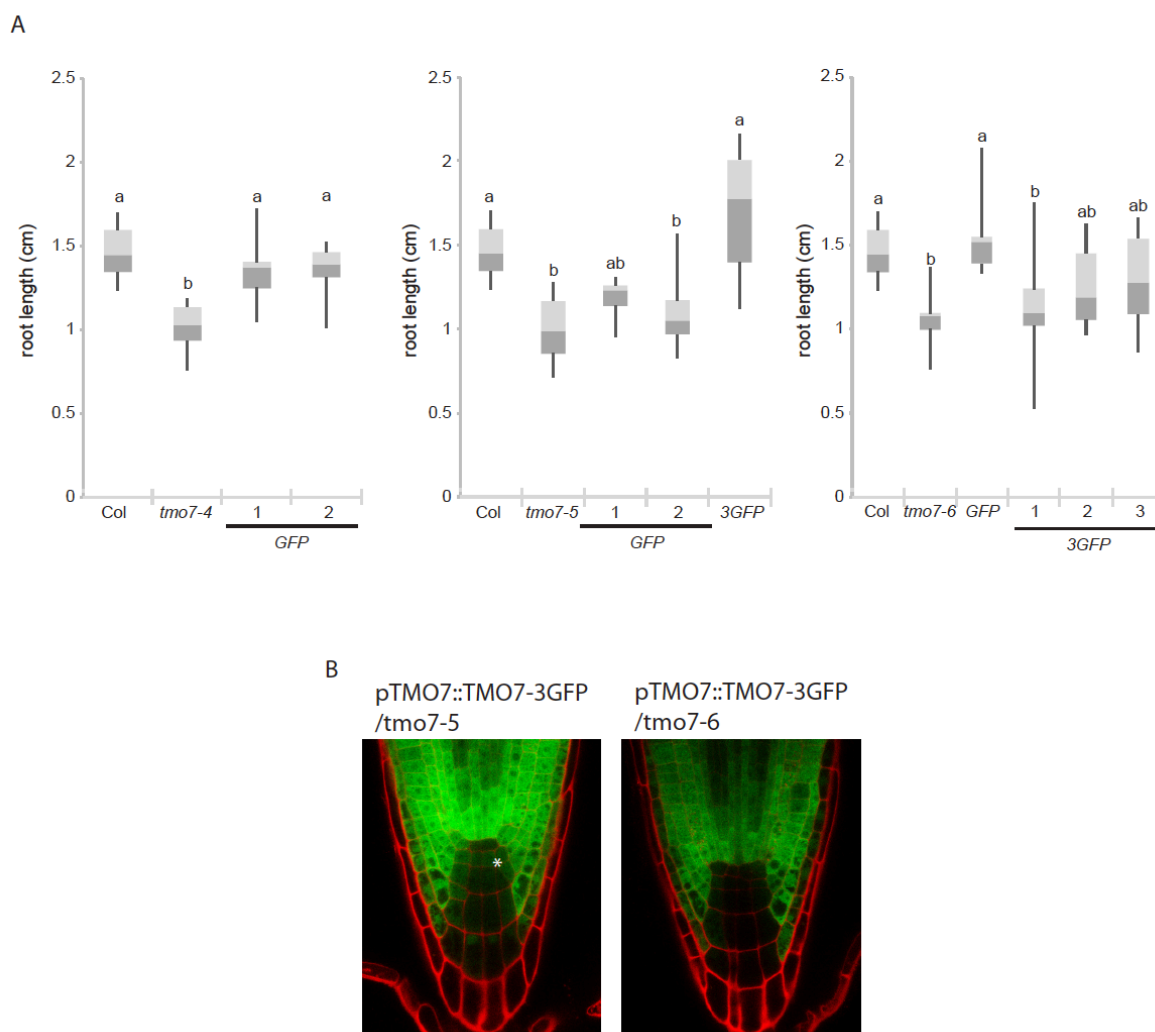

**Fig S4. *tmo7* root complementation analysis and confocal images.** (A) Box plot of 5-day-old seedling root length in different mutant background. Significant differences ( $p < 0.05$ ), as determined by one-way ANOVA with Tukey's post-hoc analysis, are indicated by letters above bars. (B) Confocal images of pTMO7::TMO7-3GFP in *tmo7-5* (fully complement) and *tmo7-6* (no complementation) under the same confocal settings. Note that the expression level in the QC and columella cells in *tmo7-5* (indicated by the \*) is higher than that in *tmo7-6*.

Table S1. List of oligo-nucleotides used in this research.

| Name   | Discription                  | Sequence                                                 | discription                                         |
|--------|------------------------------|----------------------------------------------------------|-----------------------------------------------------|
| KJ001  | KJ LIC-TMO7 <sup>pro</sup> F | TAGTTGGAATAGGTTCTCGAGGTAGTTTCACTTT                       | forward primer for amplifying alenine linker mutant |
| KJ002  | KJ TMO7 M1 N-term R          | GGCAGCTGCGGCCGCGGCAGCCGCTGCCATTTTTTTGT<br>AGAATATTG      | reverse primer for 5' fragement of m1 mutant        |
| KJ003  | KJ TMO7 M2 N-term R          | GGCAGCTGCGGCCGCGGCAGCCGCTGCTTGCCCTCGAA<br>CGTGATCTTC     | reverse primer for 5' fragement of m2 mutant        |
| KJ004  | KJ TMO7 M3 N-term R          | GGCAGCTGCGGCCGCGGCAGCCGCTGCTTCTGAGATC<br>CTTGAAGTTC      | reverse primer for 5' fragement of m3 mutant        |
| KJ005  | KJ TMO7 M4 N-term R          | GGCAGCTGCGGCCGCGGCAGCCGCTGCCTTGATAATC<br>AGATCATTGA      | reverse primer for 5' fragement of m4 mutant        |
| KJ006  | KJ TMO7 M5 N-term R          | AGCTGCGGCCGCGGCAGCCGCCCTGAGCTCAGGAAGA<br>AGCT            | reverse primer for 5' fragement of m5 mutant        |
| KJ007  | KJ TMO7 M6 N-term R          | GGCAGCTGCGGCCGCGGCAGCCGCTGCTGTCAATAT<br>GTATCATGTA       | reverse primer for 5' fragement of m6 mutant        |
| KJ008  | KJ TMO7 M7 N-term R          | GGCAGCTGCGGCCGCGGCAGCCGCTGCATCTTGTAAC<br>ACCCTGCTG       | reverse primer for 5' fragement of m7 mutant        |
| KJ009  | KJ TMO7 M8 N-term R          | GGCAGCTGCGGCCGCGGCAGCCGCTGCATGCAGATTC<br>CGTATGTAGT      | reverse primer for 5' fragement of m8 mutant        |
| KJ010  | KJ TMO7 M9 N-term R          | GGCAGCTGCGGCCGCGGCAGCCGCTGCCCTCACTTA<br>GATCATCAA        | reverse primer for 5' fragement of m9 mutant        |
| KJ011  | KJ TMO7 M10 N-term R         | GGCAGCTGCGGCCGCGGCAGCCGCTGCGTCTGAGTTT<br>GCTAGTAACT      | reverse primer for 5' fragement of m10 mutant       |
| KJ012  | KJ TMO7 M11 N-term R         | GGCAGCTGCGGCCGCGGCAGCCGCTGCGCTTCTGATT<br>AAAGCAGCTT      | reverse primer for 5' fragement of m11 mutant       |
| KJ013  | KJ TMO7 M1 C-term F          | GCAGCGGCTGCCGCGGCCGCGAGCTGCCTCATCAGGAA<br>CTTCAAGGAT     | Forward primer for 3' fragment of m1 mutant         |
| KJ014  | KJ TMO7 M2 C-term F          | GCAGCGGCTGCCGCGGCCGCGAGCTGCCGATCAAATCA<br>ATGATCTGATTA   | Forward primer for 3' fragment of m2 mutant         |
| KJ015  | KJ TMO7 M3 C-term F          | GCAGCGGCTGCCGCGGCCGCGAGCTGCCTTGCAACAGC<br>TTCTTCTGAG     | Forward primer for 3' fragment of m3 mutant         |
| KJ016  | KJ TMO7 M4 C-term F          | GCAGCGGCTGCCGCGGCCGCGAGCTGCCAGGGACAGTC<br>GTCGTCCGA      | Forward primer for 3' fragment of m4 mutant         |
| KJ017  | KJ TMO7 M5 C-term F          | GCGGCTGCCGCGGCCGCGAGCTGTATGCTGAATCTAACT<br>AAGT          | Forward primer for 3' fragment of m5 mutant         |
| KJ018  | KJ TMO7 M6 C-term F          | GCAGCGGCTGCCGCGGCCGCGAGCTGCCACGTGCAACT<br>ACATACGGAA     | Forward primer for 3' fragment of m6 mutant         |
| KJ019  | KJ TMO7 M7 C-term F          | GCAGCGGCTGCCGCGGCCGCGAGCTGCCAGAGAGGTTG<br>ATGATCTAAG     | Forward primer for 3' fragment of m7 mutant         |
| KJ020  | KJ TMO7 M8 C-term F          | GCAGCGGCTGCCGCGGCCGCGAGCTGCCCTATCTGAGTT<br>ACTAGAAA      | Forward primer for 3' fragment of m8 mutant         |
| KJ021  | KJ TMO7 M9 C-term F          | GCAGCGGCTGCCGCGGCCGCGAGCTGCCACTGCACAAG<br>CTGCTTTAATCAGA | Forward primer for 3' fragment of m9 mutant         |
| KJ022  | KJ TMO7 M10 C-term F         | GCAGCGGCTGCCGCGGCCGCGAGCTGCCTACTTACCCA<br>ATATCCTTATGA   | Forward primer for 3' fragment of m10 mutant        |
| KJ023  | KJ TMO7 M11 C-term F         | GCAGCGGCTGCCGCGGCCGCGAGCTGCCCTGATTATG<br>CTGGATCCATGGT   | Forward primer for 3' fragment of m11 mutant        |
| KJ024  | KJ GFP-LIC R                 | TTATGGAGTTGGGTTCCGAATTACTTGTACAGCTCGTCC<br>A             | Reverse primer for amplifying alenine linker mutant |
| KJ 276 | KJ bHLH151 F                 | TAGTTGGAATGGGTTCCATGGGTGTAACATTAGAAGG                    | Forward primer for bHLH151                          |
| KJ 277 | KJ bHLH151 R                 | AGCATAATCAGGAACATCATAAGGATAAACACAGTTA<br>GTTTCGGTCA      | Reverse primer for bHLH151                          |
| KJ 278 | KJ GFP F                     | TATCCTTATGATGTTCTGATTATGCTATGGTGAGCAA<br>GGGCGAGGA       | Forward primer of GFP for bHLH151/138-GFP           |
| KJ 279 | KJ bHLH138 F                 | TAGTTGGAATGGGTTCCATGGAACGTTACACAAAAAA                    | Forward primer for bHLH138                          |
| KJ 280 | KJ bHLH138 R                 | AGCATAATCAGGAACATCATAAGGATAAAAAGTGGTGT<br>ACAAATCTAA     | Reverse primer for bHLH138                          |
| KJ 301 | KJ bHLH151M5 5'R             | cttgctggaacgacgactgtccctaacaagctcttttagcgtct             | Reverse primer for 5' fragment of M5 insertion      |

|            |                             |                                                                           |                                                                          |
|------------|-----------------------------|---------------------------------------------------------------------------|--------------------------------------------------------------------------|
| KJ 302     | KJ bHLH151M5 3'F            | agggacagctgctgctccgacaagtagtaggactctttagaca                               | Forward primer for 3' fragment of M5 insertion                           |
| KJ 305     | KJ bHLH138M5 5'R            | cttgctggaaacgacgactgtccctaatgaggtctttaaagtcga                             | Reverse primer for 5' fragment of M5 insertion                           |
| KJ 306     | KJ bHLH138M5 3'F            | agggacagctgctgctccgacaaggaagcatccattgttcaaga                              | Forward primer for 3' fragment of M5 insertion                           |
| KJ 311     | KJ bHLH138M89 5'R           | taactcagatagctcacttagatcatcaacctctctaactcgttgatgtaaacga                   | Reverse primer for 5' fragment of M8, M9 insertion                       |
| KJ 312     | KJ bHLH138M89 3'F           | ctaagtgagctatctgagttagctagcaaacactgacacaaagactagtttagcgagct               | Forward primer for 3' fragment of M8, M9 insertion                       |
| KJ 313     | KJ bHLH151M89 5'R           | taactcagatagctcacttagatcatcaacctctcctcaagccaagataataatcg                  | Reverse primer for 5' fragment of M8, M9 insertion                       |
| KJ 314     | KJ bHLH151M89 3'F           | ctaagtgagctatctgagttagctagcaaacactgacagcaaatgaaagtgaaagtat                | Forward primer for 3' fragment of M8, M9 insertion                       |
| KJ 240     | KJ LIC-bHLH134 F            | TAGTTGGAATGGGTTCCATGTCTTCTAGCAGAAGGTC                                     | Forward primer for bHLH134-GFP                                           |
| KJ 214     | KJ bHLH134 R                | TCCTCGCCCTTGCTCACCATTCATTAATCAAGCTCCTAA                                   | Reverse primer for bHLH134-GFP                                           |
| KJ 241     | KJ LIC-bHLH136 F            | TAGTTGGAATGGGTTCCATGTGCGAACAGAAGATCAAGG                                   | Forward primer for bHLH136-GFP                                           |
| KJ 216     | KJ bHLH136 R                | TCCTCGCCCTTGCTCACCATCATGAGTAGGCTTCTAATAA                                  | Reverse primer for bHLH136-GFP                                           |
| KJ 233     | KJ LIC-bHLH161              | TAGTTGGAATGGGTTCCATGGCGACGAACATCGGAAT                                     | Forward primer for bHLH161-GFP                                           |
| KJ145      | KJ bHLH161 R                | tcctcgcccttgctcaccatctgcataagcaaacctcgga                                  | Reverse primer for bHLH161-GFP                                           |
| KJ 242     | KJ LIC-bHLH166 F            | TAGTTGGAATGGGTTCCATGTCTAACAGAAGATCAAGG                                    | Forward primer for bHLH166-GFP                                           |
| KJ 219     | KJ bHLH166 R                | TCCTCGCCCTTGCTCACCATCATGAGTAAGCTTCTAATCA                                  | Reverse primer for bHLH166-GFP                                           |
| KJ 229     | KJ LIC-NES-GFP R            | TTATGGAGTTGGGTTTCATCAAGAGTAAGTCTTTCAAGAGGAGGAAGTTGAAGCTTGTACAGCTCGTCCATGC | Reverse primer for TMO7-GFP-NES                                          |
| KJ 231     | KJ LIC-NLS-TMO7 F           | TAGTTGGAATGGGTTCCATGCCTAAGAAGAAGAGGAAAGGTTATGTCGGGAAGAAGATCACG            | Forward primer for NLS-TMO7-GFP                                          |
| KJ 281     | KJ TMO7 S39A 5' R           | cttgctggaaacgacgagcgtccct                                                 | Reverse primer for TMO7S39A 5' fragmen                                   |
| KJ 282     | KJ TMO7 S42A 5' R           | cttgctggcaacgacgactgtccct                                                 | Reverse primer for TMO7S42A 5' fragment                                  |
| KJ 283     | KJ TMO7 S39A 3' F           | agggacgctgctgctccgacaag                                                   | Forward primer for TMO7S39A 3' fragment                                  |
| KJ 284     | KJ TMO7 S42A 3' F           | agggacagctgctgctccgacaag                                                  | Forward primer for TMO7S42A 3' fragment                                  |
| KJ 249     | KJ TMO7 CRISPR amplify F    | ATTTTTCATAAAACAAATAAT                                                     | Forward primer for amplifying TMO7 genomic fragment for genotyping       |
| KJ 250     | KJ TMO7 CRISPR amplify R    | CCTCTCTATGCAGATTCCGT                                                      | Reverse primer for amplifying TMO7 genomic fragment for genotyping       |
| KJ 251     | KJ TMO7 CRISPR sequencing F | acataataacaaccgtcact                                                      | sequencing primer for genotyping CRISPR/Cas9 tmo7                        |
| KJ526      | KJ qbHLH134 F               | GAACAAGGAAGCCGATGACC                                                      | qPCR primer for bHLH134                                                  |
| KJ527      | KJ qbHLH134 R               | GCTCCTAATAACTGCGGCTTG                                                     | qPCR primer for bHLH134                                                  |
| KJ530      | KJ qbHLH136 F               | GCATCAGCCTCGAAAGTATTGC                                                    | qPCR primer for bHLH136                                                  |
| KJ531      | KJ qbHLH136 R               | AAACGCTCGCTCAGATTGTC                                                      | qPCR primer for bHLH136                                                  |
| KJ534      | KJ qbHLH161 F               | AAGGAACCTGAGCAAAGAAGTGG                                                   | qPCR primer for bHLH161                                                  |
| KJ535      | KJ qbHLH161 R               | TTCGGATTAGTGCAGCTTGAG                                                     | qPCR primer for bHLH161                                                  |
| KJ538      | KJ qbHLH166 F               | TGTCAGCATCAAAGGTAACAAGA                                                   | qPCR primer for bHLH166                                                  |
| KJ539      | KJ qbHLH166 R               | TCAAGAAGCTGCGACAAACG                                                      | qPCR primer for bHLH166                                                  |
| BR210      | Q_TMO7_end_F                | CAACTACATACGGAATCT                                                        | qPCR primer for TMO7                                                     |
| BR211      | Q_TMO7_end_R                | AAGATAGATAGGAATTATTGG                                                     | qPCR primer for TMO7                                                     |
| JP001      | ACT2                        | CTCCATTGTTTGTTCATT                                                        | qPCR primer for ACT2                                                     |
| JP002      | ACT2                        | TCAATTCGATCACTCAGA                                                        | qPCR primer for ACT2                                                     |
| U6-F-Slice |                             | ttactagataactagctgctggccgc <b>TCGTTGAACAACGGAAACTCG</b>                   | Forward primer for U6 promoter amplification with adaptor site for SLICE |

|                      |  |                                                      |                                                                                   |
|----------------------|--|------------------------------------------------------|-----------------------------------------------------------------------------------|
| TMO7<br>-U6-<br>sg-R |  | TGTCGGAACGACGACTGTCCAATCACTACTTCGACTC<br><b>TAG</b>  | Reverse primer with TMO7<br>sgRNA site to amplify U6<br>promoter                  |
| TMO7<br>-guide-<br>F |  | GGACAGTCGTCGTTCCGACAGTTTATAGAGCTAGAAAT<br><b>AGC</b> | Forward primer with TMO7<br>sgRNA site to amplify sgRNA<br>scaffold               |
| guide-<br>R-Slice    |  | gcttgagctctcccatatggtcgaccGAATTCGAGCTCGGTACCC        | Reverse primer for sgRNA<br>scaffold amplification with<br>adaptor site for SLiCE |



Table S2. Two of the predicted phosphorylation sites are located in M5 region.

| <a href="http://www.dabi.temple.edu/disphos/">http://www.dabi.temple.edu/disphos/</a> |         |       |                   |        |
|---------------------------------------------------------------------------------------|---------|-------|-------------------|--------|
| DISPHOS Results                                                                       |         |       |                   |        |
| Position                                                                              | Residue | Score | Sequence          | Yes/No |
| 2                                                                                     | S       | 0.987 | ***MSGRRS         | YES    |
| 6                                                                                     | S       | 0.984 | SGRRSRSRQ         | YES    |
| 8                                                                                     | S       | 0.94  | RRRSRQSS          | YES    |
| 11                                                                                    | S       | 0.813 | RSRQSSGTS         | YES    |
| 12                                                                                    | S       | 0.682 | SRQSSGTSR         | YES    |
| 14                                                                                    | T       | 0.02  | QSSGTSRIS         |        |
| 15                                                                                    | S       | 0.691 | SSGTSRISE         | YES    |
| 18                                                                                    | S       | 0.479 | TSRISEDQI         |        |
| 39                                                                                    | S       | 0.751 | ELR <b>DSRRSD</b> | YES    |
| 42                                                                                    | S       | 0.64  | <b>DSRRSDKVS</b>  | YES    |
| 46                                                                                    | S       | 0.295 | SDKVSAARV         |        |
| 54                                                                                    | T       | 0.006 | VLQDTCNYI         |        |
| 57                                                                                    | Y       | 0.02  | DTCNYIRNL         |        |
| 69                                                                                    | S       | 0.341 | VDDLSERLS         |        |
| 73                                                                                    | S       | 0.411 | SERLSELLA         |        |
| 79                                                                                    | S       | 0.141 | LLANSDTAQ         |        |
| 81                                                                                    | T       | 0.042 | ANSDTAQAA         |        |
| 89                                                                                    | S       | 0.13  | ALIRSLLTQ         |        |
| 92                                                                                    | T       | 0.006 | RSLLTQ***         |        |

Table S3. *tmo7-4*, -5 and -6 have significantly shorter root compare to Col.

|         | Length |               | Length      |               | Length      |               | Length      |
|---------|--------|---------------|-------------|---------------|-------------|---------------|-------------|
| Col     | 2.69   | <i>tmo7-4</i> | 1.814       | <i>tmo7-5</i> | 1.885       | <i>tmo7-6</i> | 2.046       |
|         | 2.645  |               | 1.812       |               | 1.74        |               | 1.683       |
|         | 2.398  |               | 1.773       |               | 1.56        |               | 1.679       |
|         | 2.393  |               | 1.731       |               | 1.543       |               | 1.612       |
|         | 2.358  |               | 1.71        |               | 1.531       |               | 1.5         |
|         | 2.333  |               | 1.703       |               | 1.487       |               | 1.491       |
|         | 2.311  |               | 1.663       |               | 1.465       |               | 1.481       |
|         | 2.228  |               | 1.602       |               | 1.463       |               | 1.472       |
|         | 2.164  |               | 1.599       |               | 1.431       |               | 1.472       |
|         | 2.137  |               | 1.584       |               | 1.369       |               | 1.461       |
|         | 2.114  |               | 1.581       |               | 1.358       |               | 1.438       |
|         | 2.093  |               | 1.531       |               | 1.29        |               | 1.344       |
|         | 2.065  |               | 1.469       |               | 1.244       |               | 1.279       |
|         | 1.897  |               | 1.428       |               | 1.209       |               | 1.203       |
|         | 1.848  |               | 1.397       |               | 1.207       |               | 1.165       |
|         | 1.77   |               | 1.367       |               | 1.165       |               | 1.159       |
|         | 1.753  |               | 1.355       |               | 1.136       |               | 1.155       |
|         |        |               | 1.298       |               | 1.093       |               | 1.026       |
|         |        |               | 1.244       |               | 1.033       |               | 0.888       |
|         |        |               | 0.952       |               |             |               |             |
| p-value |        | <i>tmo7-4</i> | 1.59408E-09 | <i>tmo7-5</i> | 2.24588E-11 | <i>tmo7-6</i> | 3.38143E-10 |

Table S4 pTMO7::TMO7-GFP rescued the *tmo7* embryo phenotype.

| Line                  | mutant number | wild type number | Total number | %    |
|-----------------------|---------------|------------------|--------------|------|
| Col                   | 5             | 217              | 222          | 2.25 |
|                       |               |                  |              |      |
| <i>tmo7-4</i>         | 15            | 163              | 178          | 8.43 |
| pTMO7::TMO7-GFP T2-1  | 5             | 216              | 221          | 2.26 |
| pTMO7::TMO7-GFP T2-2  | 2             | 141              | 143          | 1.40 |
|                       |               |                  |              |      |
| <i>tmo7-5</i>         | 9             | 127              | 136          | 6.62 |
| pTMO7::TMO7-GFP T2-1  | 6             | 267              | 273          | 2.20 |
| pTMO7::TMO7-GFP T2-2  | 5             | 228              | 233          | 2.15 |
| pTMO7::TMO7-3GFP T2-1 | 3             | 188              | 191          | 1.57 |
|                       |               |                  |              |      |
| <i>tmo7-6</i>         | 9             | 198              | 207          | 4.35 |
| pTMO7::TMO7-GFP T2-2  | 2             | 144              | 146          | 1.37 |
| pTMO7::TMO7-3GFP T2-2 | 9             | 197              | 206          | 4.37 |
| pTMO7::TMO7-3GFP T2-3 | 11            | 252              | 263          | 4.18 |
| pTMO7::TMO7-3GFP T2-5 | 14            | 224              | 238          | 5.88 |

Table S5. p*TMO7*::TMO7-GFP did not rescue the *cald3-2d* hypophysis phenotype

| Lines in <i>cals3-2d</i>         | mutant number | wild type number | Total number | %    |
|----------------------------------|---------------|------------------|--------------|------|
| p <i>TMO7</i> ::TMO7-GFP T3-10-2 | 189           | 3                | 192          | 1.56 |
| p <i>TMO7</i> ::TMO7-GFP T3-15-5 | 220           | 2                | 222          | 0.90 |
| p <i>TMO7</i> ::TMO7-GFP T3-15-9 | 193           | 3                | 196          | 1.53 |
| pDR5::GFP T3-3-4                 | 190           | 2                | 192          | 1.04 |
| pDR5::GFP T3-10-1                | 143           | 2                | 145          | 1.38 |
| pDR5::GFP T3-11-7                | 167           | 2                | 169          | 1.18 |
